# Supplementary material for: Assessment of Risk Hospitalization due to Acute Respiratory Incidents Related to Ozone Exposure in Silesian Voivodeship (Poland)
Source: MDPI journal article supplement (doi:10.3390/ijerph17103591), 2020-05-20
Supplement: s1 [file s1]

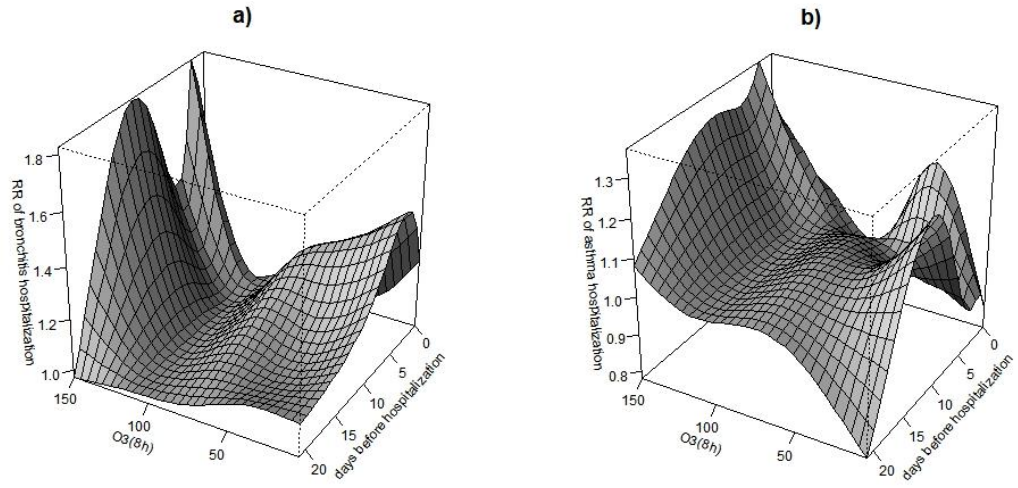

**Figure 1.** Relative risk  $RR_t$  of daily hospitalizations due to: **a)** Bronchitis (J20–J21), **b)** asthma (J45–J46), related to eight-hour O<sub>3</sub> ozone concentration.

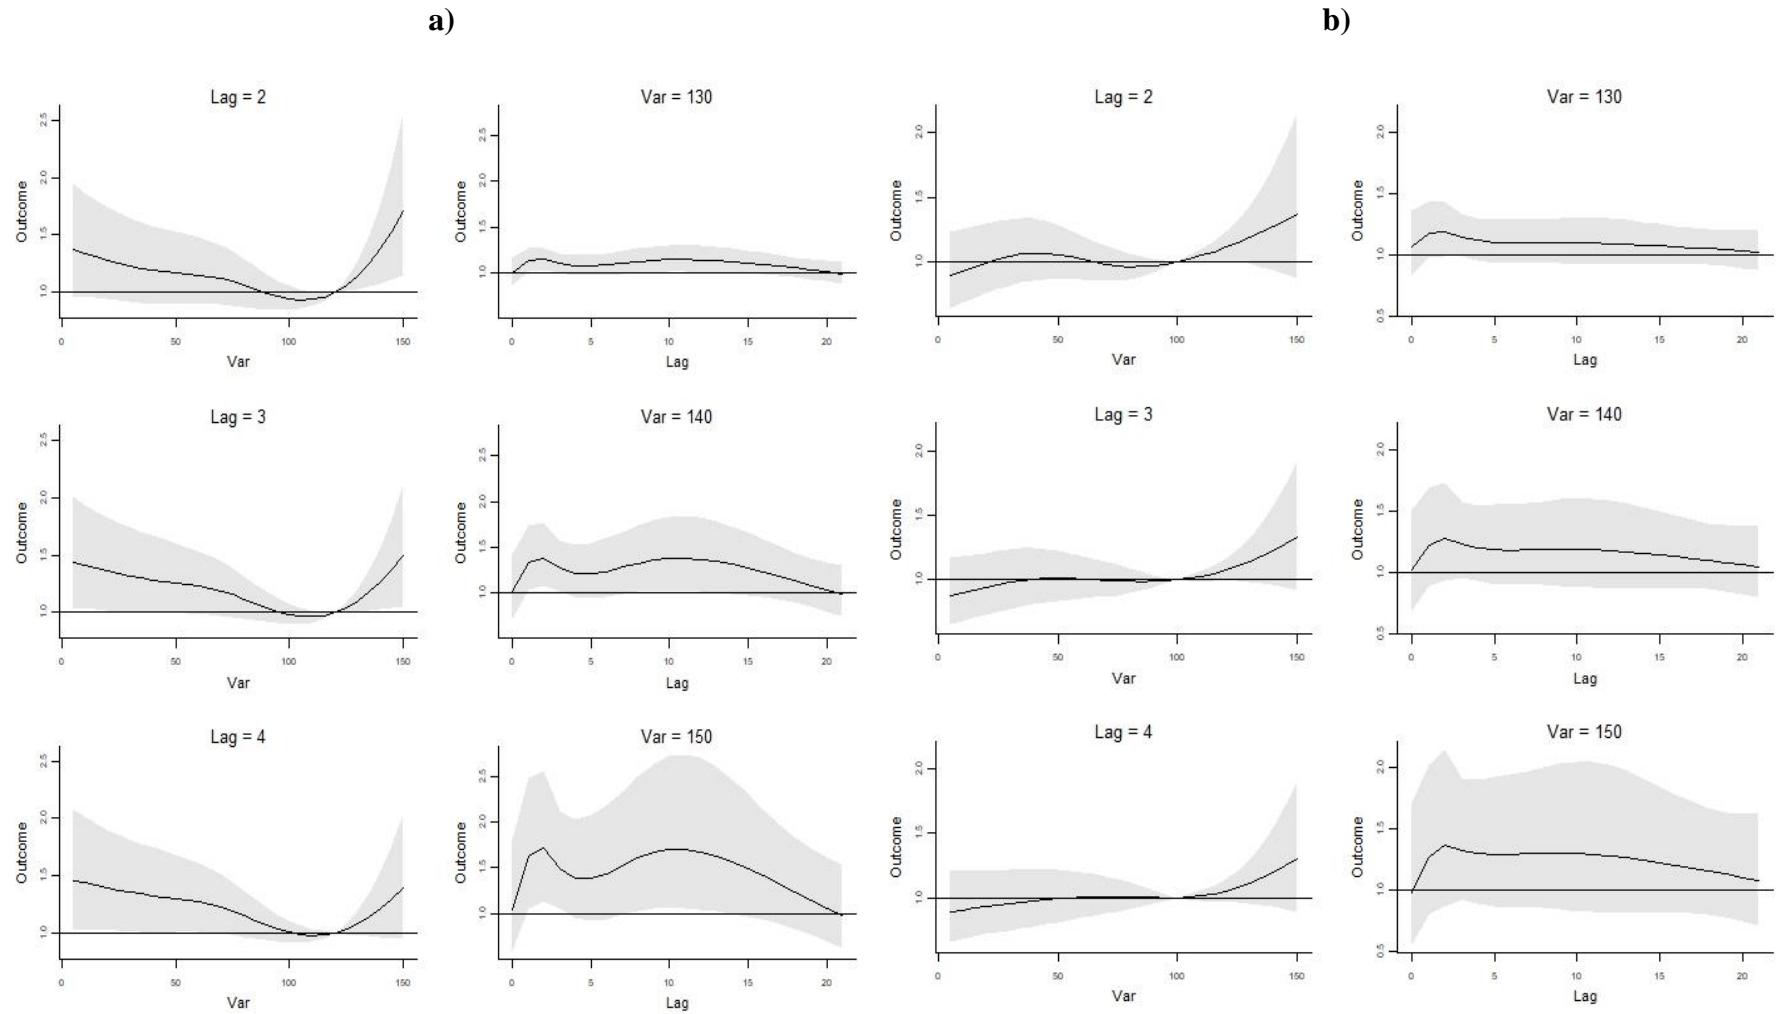

**Figure 2.** Relative risk  $RR_l$  of daily hospitalizations due to: **a)** Bronchitis (J20–J21), **b)** asthma (J45–J46), in the first days after exposure and associated with an 8 h ozone concentration increase by next unit ( $10 \mu\text{g}/\text{m}^3$ ) compared to a normative value of  $120 \mu\text{g}/\text{m}^3$ .
